# Supplementary material for: The epidemiology of childhood intussusception in South Korea: An observational study
Source: PubMed Central journal article supplement (PMC6924652; doi:10.1371/journal.pone.0219286), 2019-12-20
Supplement: pone.0219286.s001.pdf [file pone.0219286.s001.pdf]

| Birth year              | 2002 2003 2004 2005 2006 2007 2008 |             |             |             |             |             |  | 2009 2010 2011 2012 2013 |  |  |  |       | Number of neonates by birth year (N=63,722) |
|-------------------------|------------------------------------|-------------|-------------|-------------|-------------|-------------|--|--------------------------|--|--|--|-------|---------------------------------------------|
|                         | 0                                  | 1           | 2           | 3           | 4           | 5           |  |                          |  |  |  |       |                                             |
| Birth age by birth year | 0 1 2 3 4 5                        |             |             |             |             |             |  |                          |  |  |  |       | 9,546                                       |
|                         |                                    | 0 1 2 3 4 5 |             |             |             |             |  |                          |  |  |  |       | 9,419                                       |
|                         |                                    |             | 0 1 2 3 4 5 |             |             |             |  |                          |  |  |  |       | 9,300                                       |
|                         |                                    |             |             | 0 1 2 3 4 5 |             |             |  |                          |  |  |  |       | 8,533                                       |
|                         |                                    |             |             |             | 0 1 2 3 4 5 |             |  |                          |  |  |  |       | 7,850                                       |
|                         |                                    |             |             |             |             | 0 1 2 3 4 5 |  |                          |  |  |  |       | 9,712                                       |
|                         |                                    |             |             |             |             | 0 1 2 3 4 5 |  |                          |  |  |  | 9,362 |                                             |
